# Supplementary material for: Effect of methoxy group instead of polar group in the nematic phase of four-ring bent-core liquid crystals
Source: Royal Society of Chemistry journal article supplement (doi:10.1039/c4ra12162g), 2014-12-15
Supplement: c4ra12162g1.pdf [file c4ra12162g1.pdf]

## Electronic Supplementary Information

### Effect of methoxy group instead of polar group in the nematic phase of four-ring bent-core liquid crystals

Amina Nafees<sup>a</sup>, Gayatri Kalita<sup>b</sup>, Manoj Kumar Paul<sup>b</sup>, Aloka Sinha<sup>a</sup> and Nandiraju V. S. Rao<sup>b</sup>

<sup>a</sup> Department of Physics, Indian Institute of Technology Delhi, Hauz Khas, New Delhi-110016, India;

E-mail: [aloka@physics.iitd.ac.in](mailto:aloka@physics.iitd.ac.in); Tel: +91-11-26596003 (O).

<sup>b</sup> Chemistry Department, Assam University, Silchar-788011, Assam, India; E-mail:

[drnvsrao@gmail.com](mailto:drnvsrao@gmail.com); Tel: +91-9435522541.

#### 1 Procedure for the Synthesis of the compounds GK1 and GK2

(4'-methoxy phenyl azo) phenyl-4-yl 3-[N-(4'-n-heptyloxy-2-hydroxybenzylidene) amino]-2-methyl benzoate (GK1): 2-Methyl-3-N-(4-n-butyloxy-2-hydroxybenzylidene) amino benzoic acid (0.65g, 2mmol) and 4-hydroxy-4'-methoxy azobenzene (0.456g, 2mmol) were dissolved in dry dichloromethane (DCM) (50ml) and catalytic amount of 4-dimethylaminopyridine (DMAP) (4mg,0.02mmol) was added to the solution. A solution of N, N'-dicyclohexylcarbodiimide DCC (0.49g, 2.4mmol) was added to the reaction mixture and the mixture was stirred for 48 h under inert atmosphere at room temperature. The precipitate of N, N'-dicyclohexylurea was removed by filtration and the solvent DCM was evaporated to get crude product. The crude product was purified by column chromatography using silica gel (60-120 mesh) with hexane/chloroform (9:1) as eluents. The yellow solid was recrystallized several times from absolute ethanol to get the pure product. Yellow solid, Yield: 0.81 g (69.9%). IR  $\nu_{\max}$  in  $\text{cm}^{-1}$ : 3194( $\nu_{\text{O-H}}$ , H-bonded), 1730 ( $\nu_{\text{C=O}}$ , ester), 1604 ( $\nu_{\text{C=N}}$ , imine). <sup>1</sup>H-NMR (400 MHz, CDCl<sub>3</sub>): ( $\delta_{\text{H}}$ ), 13.35 (s, 1H, -OH), 8.35 (s, 1H, -CH=N-), 7.91 (dd, 1H, J = 2.0 Hz, J = 7.6 Hz, ArH), 7.87 (dd, 2H, J = 1.6 Hz, 6.8 Hz, ArH), 7.84 (dd, 2H, J = 2.0 Hz, J = 7.2 Hz, ArH), 7.32 (t, 1H, J = 8.8 Hz, ArH), 7.30 (d, 1H, J = 8.4 Hz, ArH), 7.29 (dd, 1H, J = 2.0 Hz, J = 7.2 Hz, ArH), 7.24 (d, 2H, J = 8.4 Hz, ArH), 6.95 (dd, 2H, J = 2.0 Hz, J = 7.6 Hz, ArH), 6.51 (dd, 2H, J = 2.0 Hz, J = 6.8 Hz, ArH), 3.98 (t, 2H, J = 6.8 Hz, -OCH<sub>2</sub>-), 3.84 (s, 3H, -OCH<sub>3</sub>-), 2.61 (s, 3H, Ar-CH<sub>3</sub>), 1.75 (q, 2H, J = 6.8 Hz, -CH<sub>2</sub>-), 1.40-1.28 (m, 8H, -(CH<sub>2</sub>)<sub>4</sub>-), 0.87 (t, 3H, J = 6.8 Hz, -CH<sub>3</sub>). Elemental Analysis calculated for C<sub>35</sub>H<sub>37</sub>N<sub>3</sub>O<sub>4</sub>: C, 72.52; H, 6.43; N, 7.25 % Found: C, 72.89; H, 6.39; N, 7.64%.

(4'-methoxy phenyl azo) phenyl-4-yl 3-[N-(4'-n-octyloxy-2-hydroxybenzylidene)amino]-2-methyl benzoate (GK2): Yellow solid, Yield: 0.84 g (70.8%). IR  $\nu_{\max}$  in  $\text{cm}^{-1}$ : 3192 ( $\nu_{\text{O-H}}$ , H-bonded), 1730 ( $\nu_{\text{C=O}}$ , ester), 1604 ( $\nu_{\text{C=N}}$ , imine). <sup>1</sup>H-NMR (400 MHz, CDCl<sub>3</sub>): ( $\delta_{\text{H}}$ ), 13.41 (s, 1H, -OH), 8.38 (s, 1H, -CH=N-), 7.91 (dd, 1H, J = 2.0 Hz, J = 7.6 Hz, ArH), 7.87 (dd, 2H, J = 2.0 Hz, 6.8 Hz, ArH), 7.85 (dd, 2H, J = 2.0 Hz, J = 7.2 Hz, ArH), 7.32 (t, 1H, J = 8.4 Hz, ArH), 7.30 (d, 1H, J = 8.0 Hz, ArH), 7.29 (dd, 1H, J = 2.0 Hz, J = 7.6 Hz, ArH), 7.02 (d, 2H, J = 8.4 Hz, ArH), 6.95 (dd, 2H, J = 2.0 Hz, J = 7.2 Hz, ArH), 6.53 (dd, 2H, J = 2.0 Hz, J = 6.8 Hz, ArH), 3.98 (t, 2H, J = 6.8 Hz, -OCH<sub>2</sub>-), 3.84 (s, 3H, -OCH<sub>3</sub>-), 2.65 (s, 3H, Ar-CH<sub>3</sub>), 1.75-1.29 (m, 10H, -(CH<sub>2</sub>)<sub>6</sub>-), 0.89 (t, 3H, J = 6.8 Hz, -CH<sub>3</sub>). Elemental Analysis calculated for C<sub>36</sub>H<sub>39</sub>N<sub>3</sub>O<sub>4</sub>: C, 72.83; H, 6.62; N, 7.08 % Found: C, 72.96; H, 6.54; N, 7.33%.

## 2 Additional textures

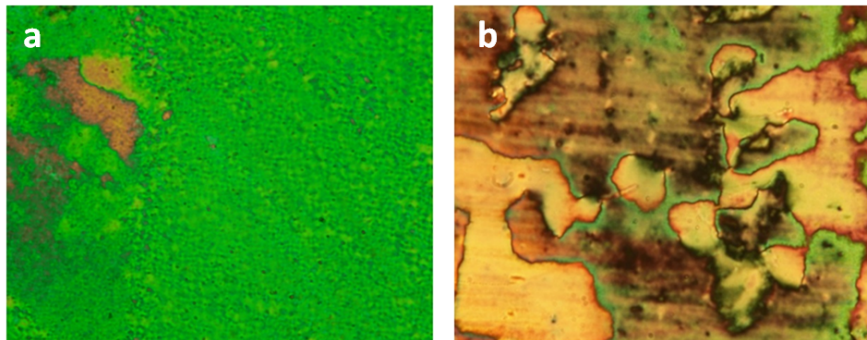

Fig. S1 Microphotographs showing (a) schlieren texture of GK1 at 165°C, and (b) of GK2 at 170.1°C.

## 3 Additional dielectric information

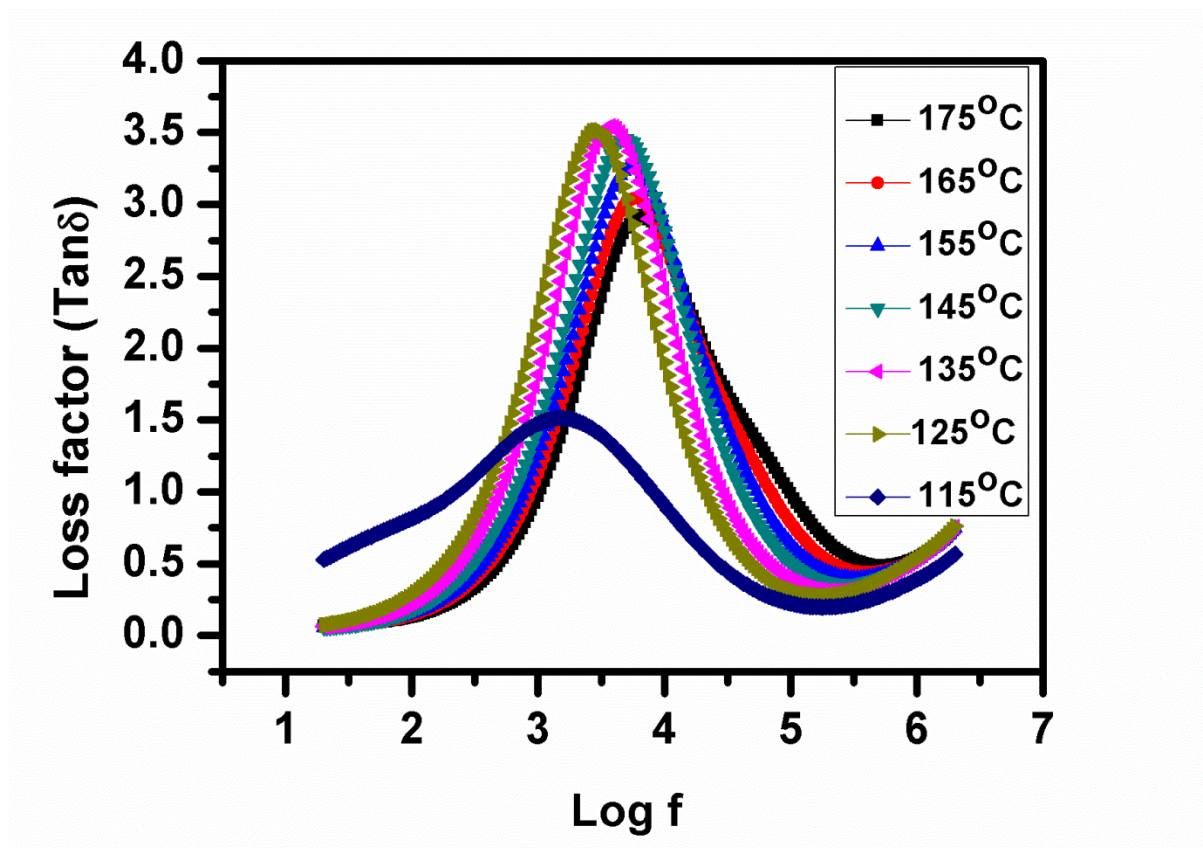

Fig. S2 The loss factor ( $\tan \delta$ ) curves as a function of frequency at different temperature carried out in sample GK1 using 7.7  $\mu\text{m}$  thick cell.

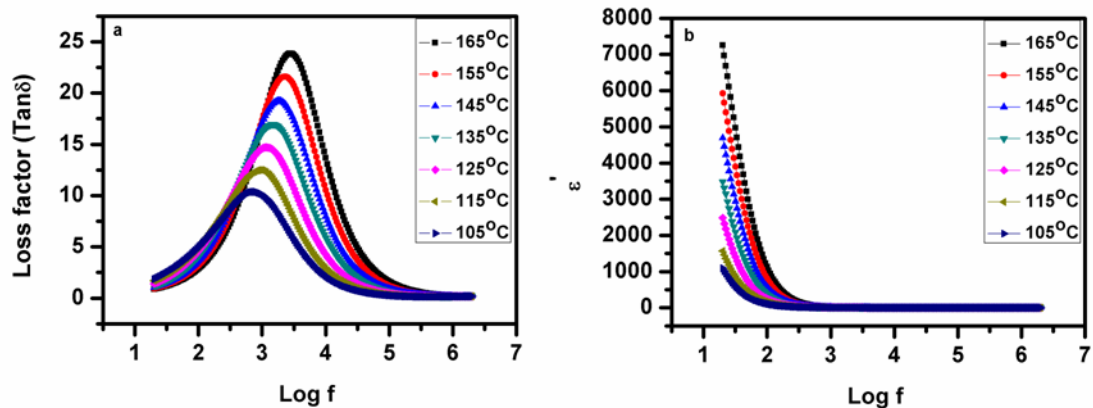

Fig. S3 Investigation of sample GK2: (a) the loss factor ( $\tan \delta$ ) curves as a function of frequency at different temperature, (b) dielectric permittivity (real part) as a function of frequency at different temperatures.

#### 4 Electro-optical studies

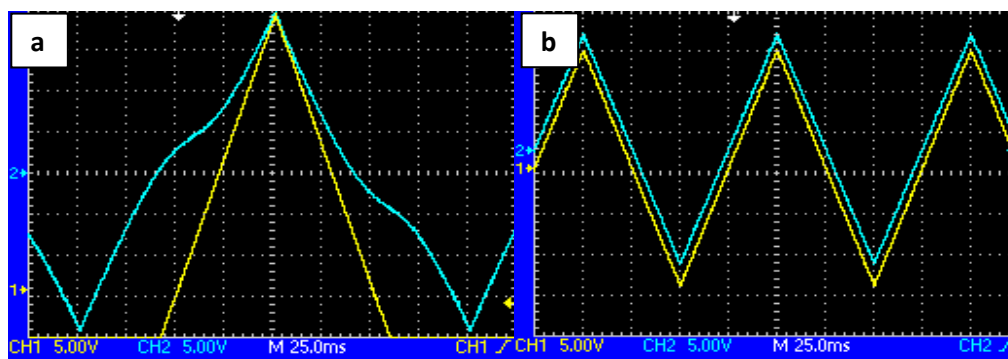

Fig. S4 Investigation of sample GK1 and GK2: (a) the current response of GK1 at 155°C in a 3.2  $\mu\text{m}$  ITO-coated cell with homogeneous alignment under a triangular wave field with 70Vpp and 5Hz, (b) the current response of GK2 at 132.5°C in a 3.2  $\mu\text{m}$  ITO-coated cell with homogeneous alignment under a triangular wave field with 30Vpp and 10Hz

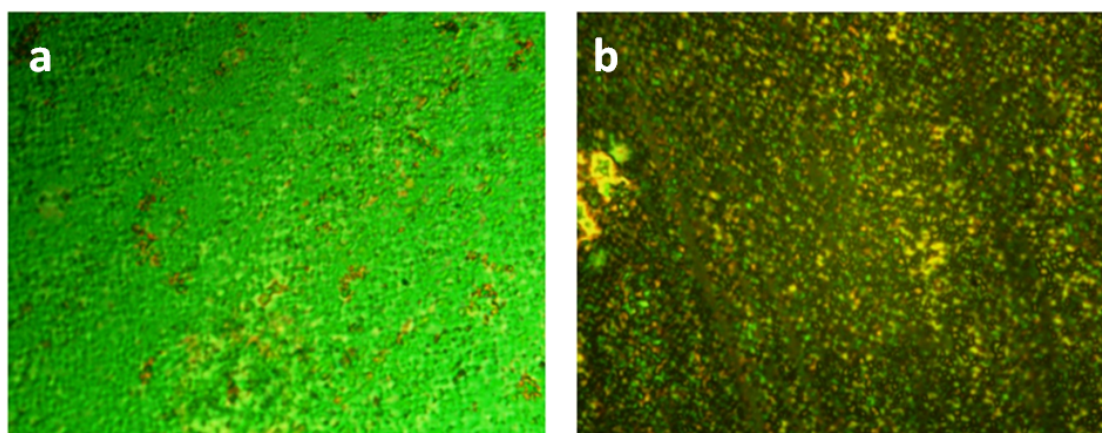

Fig. S5 Texture of (a) GK1 at 50Vpp, 10Hz and (b) of GK2 at 70Vpp, 20Hz applied ac electric field
